# Supplementary material for: Exosomal transfer of p-STAT3 promotes acquired 5-FU resistance in colorectal cancer cells
Source: Springer Nature journal article supplement (doi:10.1186/s13046-019-1314-9), 2019-07-19

Figure S1

a

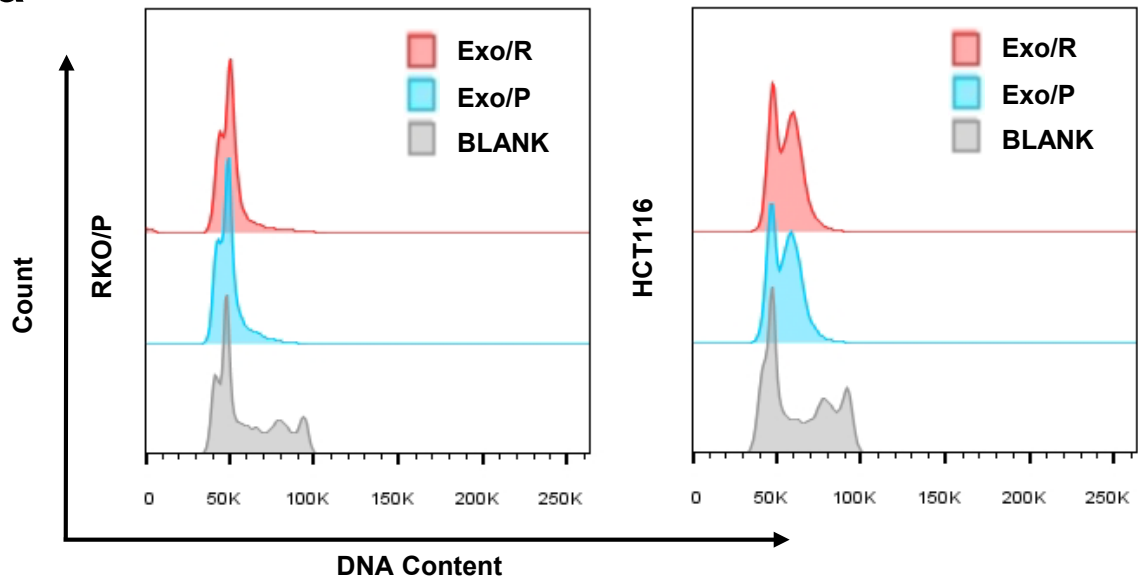

**Figure S2**

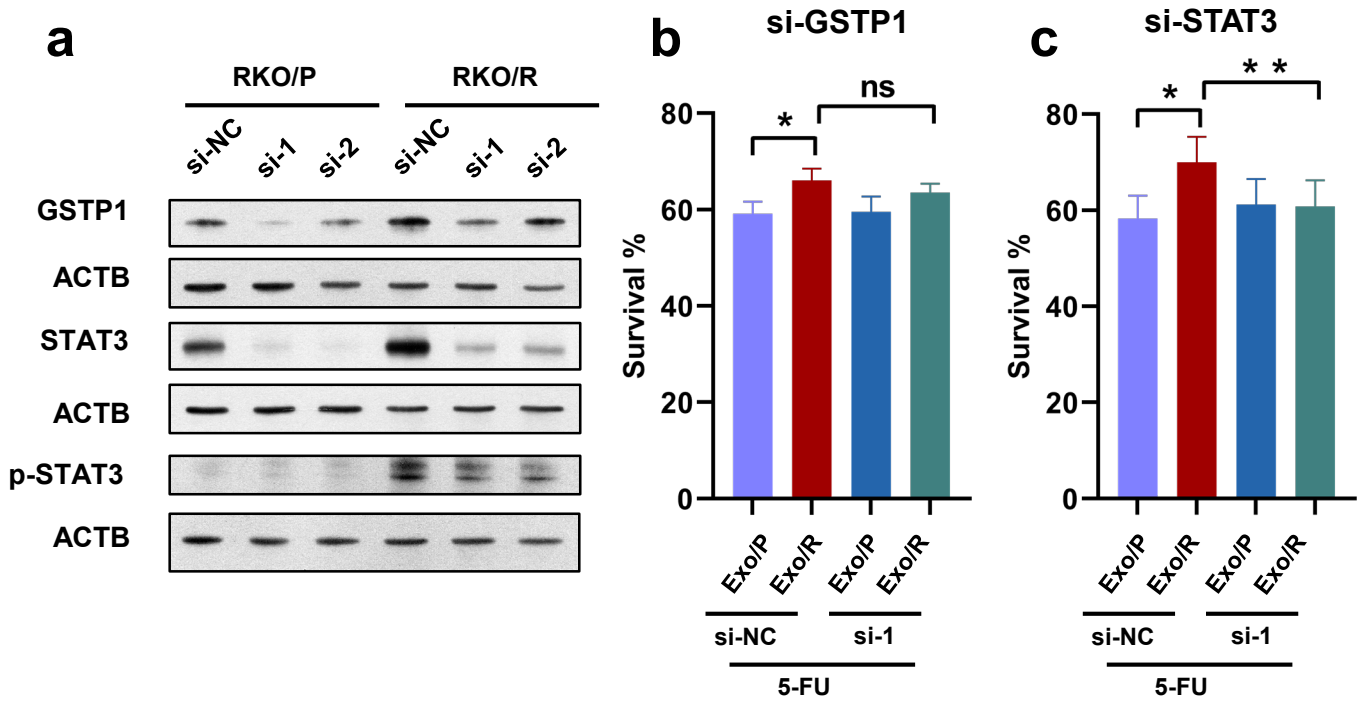

Supplement: MOESM1 [file 16965586]
